# Supplementary material
Source: publisher figshare collection journal article supplement (https://frontiersin.figshare.com/ndownloader/files/34920684)
Supplement: Supplementary file [file 34920684]

Supplementary Figure 1: Glc-6P and GlcN-6P effect over the activity of *S. coelicolor* ADP-GlcPPase. Measures were performed with 2 mM ATP and 1.5 mM of the hexose-1P, according to description in Material and Methods.

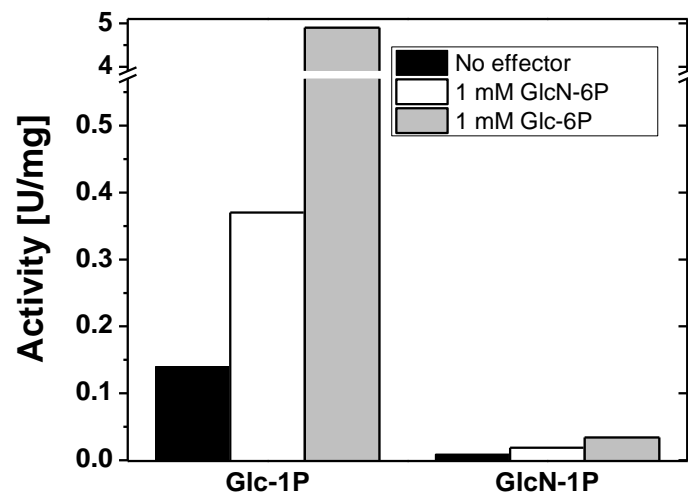

Supplementary Figure 2: ATP curve for the heterotetrameric GlgC/GlgD conformation from *G. stearothermophilus* ADP-Glc PPase. Reaction was performed in presence of 1.5 mM GlcN-1P according to descriptions stated in Material and Methods.

:

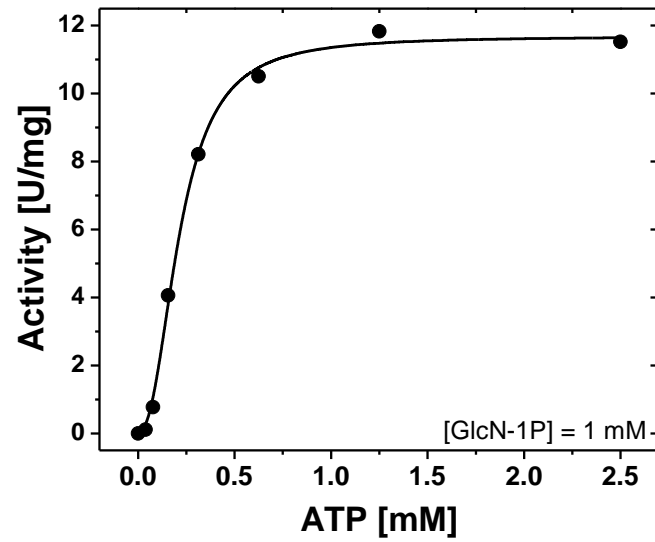

Supplementary Table 1. Comparative Glc-1P and GlcN-1P catalytic efficiencies for bacterial ADP-Glc PPases analyzed in this work. Efficiency was calculated for a single catalytic subunit. Activities were measured in presence of the corresponding activator (depending on the source) and/or in absence of them. (<sup>#</sup>) data adapted from <sup>1</sup>Cereijo et al, 2020, <sup>2</sup> Asencion Diez et al, 2012),. n.d., not determined. “Control” refers to absence of any effector.

| ADP-Glc PPase source                      | Effector        | Glc-1P efficiency<br>$k_{cat}/K_m$ (s <sup>-1</sup> mM <sup>-1</sup> ) | GlcN-1P efficiency<br>$k_{cat}/K_m$ (s <sup>-1</sup> mM <sup>-1</sup> ) | Ratio<br>efficiencies |
|-------------------------------------------|-----------------|------------------------------------------------------------------------|-------------------------------------------------------------------------|-----------------------|
| <i>R. fascians</i> <sup>#1</sup>          | GlcN-6P<br>2 mM | 15.2                                                                   | 0.23                                                                    | 62.08                 |
| <i>S. coelicolor</i>                      | Glc-6P<br>2 mM  | 30.59 <sup>#1</sup>                                                    | n.d                                                                     | n.d                   |
| <i>K. rhizophila</i>                      | GlcN-6P<br>2 mM | 71.38                                                                  | 8.82                                                                    | 8.09                  |
| <i>R. albus</i> GlgC                      | PEP<br>10 mM    | 1.88 <sup>#3</sup>                                                     | 0.03                                                                    | 62.6                  |
| <i>R. albus</i> GlgC/GlgD                 |                 | 26.9 <sup>#3</sup>                                                     | 0.43                                                                    | 62.5                  |
| <i>G. stearothermophilus</i> GlgC         | Control         | 13.39 <sup>#3</sup>                                                    | 0.36                                                                    | 37.19                 |
| <i>G. stearothermophilus</i><br>GlgC/GlgD |                 | 33.05 <sup>#3</sup>                                                    | 22.46                                                                   | 1.47                  |
| <i>A. tumefaciens</i>                     | Control         | 201.18                                                                 | 1.96                                                                    | 102.64                |

|  |                  |      |       |       |
|--|------------------|------|-------|-------|
|  | Fru-6P<br>1.5 mM | 1641 | 21.37 | 76.79 |
|  | Pyr<br>1.5 mM    | 1261 | 23.76 | 53.09 |
